# Supplementary material for: Evolution of reduced minimum critical size as a response to selection for rapid pre-adult development in Drosophila melanogaster
Source: PubMed Central journal article supplement (PMC7353974; doi:10.1098/rsos.191910), 2020-06-10
Supplement: rsos191910supp1.pdf [file rsos191910supp1.pdf]

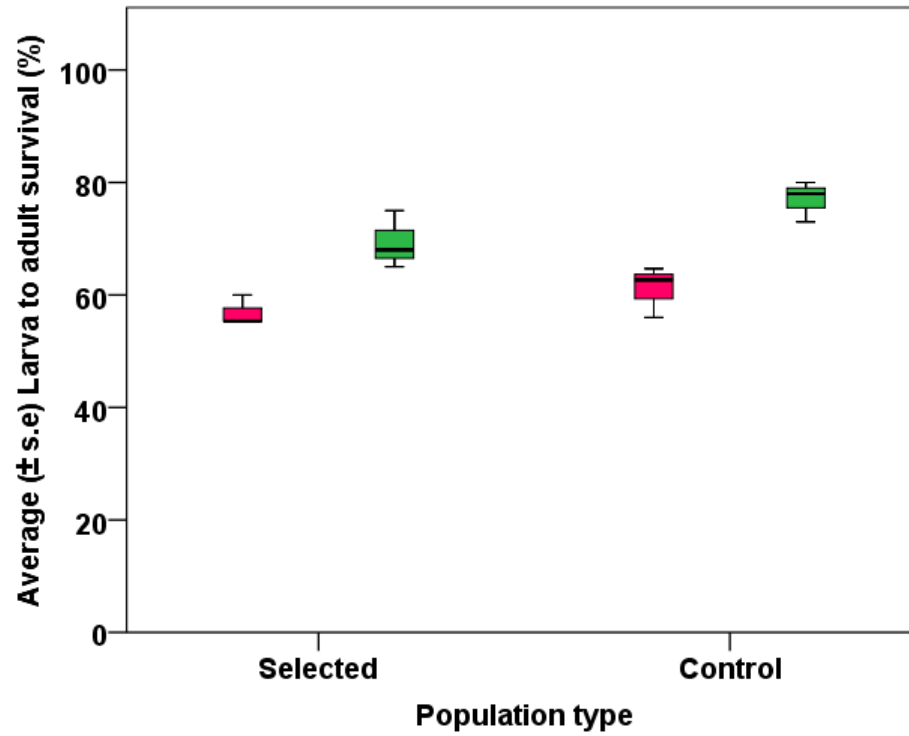

**Key for colour coding**

- Larvae fed up to critical size time point
- Larvae fed up to natural pupation time
